# Supplementary material for: Hierarchical mesoporous SrCO3 submicron spheres derived from reaction-limited aggregation induced “rod-to-dumbbell-to-sphere” self-assembly
Source: Royal Society of Chemistry journal article supplement (doi:10.1039/b923169b), 2010-01-01
Supplement: b923169b.pdf [file b923169b.pdf]

***Electronic Supplementary Information:***

# Hierarchical Mesoporous SrCO<sub>3</sub> Submicron Spheres Derived from Reaction-Limited Aggregation Induced “Rod-to-Dumbbell-to-Sphere” Self-Assembly

*Wancheng Zhu<sup>a\*</sup>, Guanglei Zhang<sup>a</sup>, Jing Li<sup>a</sup>, Qiang Zhang<sup>b†</sup>, Xianglan Piao<sup>b</sup>, and Shenlin Zhu<sup>b</sup>*

a. Department of Chemical Engineering, Qufu Normal University, Shandong 273165, China

b. Department of Chemical Engineering, Tsinghua University, Beijing 100084, China

---

\* Corresponding author. Fax: +86-537-4456305; email: [zhuwancheng@tsinghua.org.cn](mailto:zhuwancheng@tsinghua.org.cn)

† Present address: Department of Chemical Engineering, Case Western Reserve University, Cleveland, OH 44106, USA.

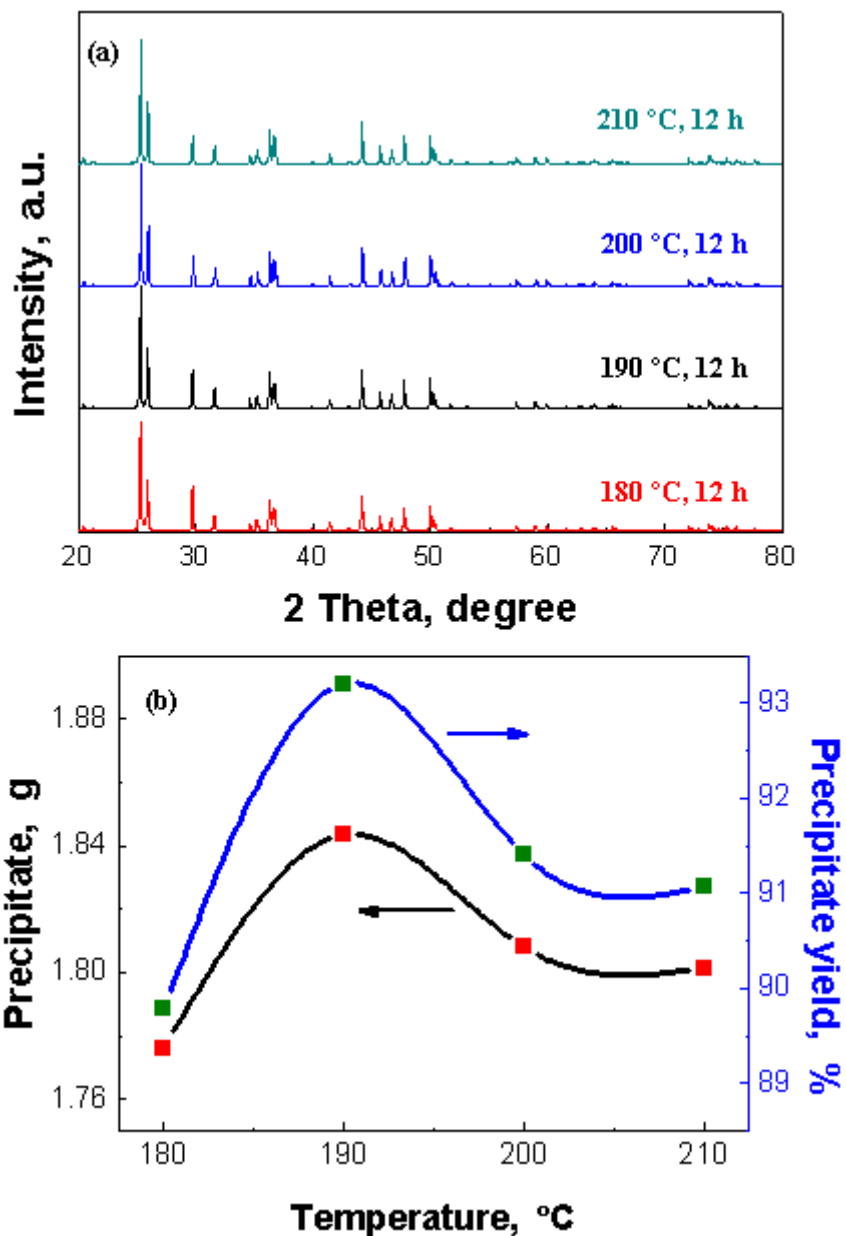

**Figure S1.** Variation of the crystallinity (a), precipitate and precipitate yield (b) of the hydrothermal product with the hydrothermal temperature.

SrCl<sub>2</sub>:Na<sub>2</sub>CO<sub>3</sub>=1:2.01; EDTA disodium salt :Na<sub>2</sub>CO<sub>3</sub> =5:100; MgCl<sub>2</sub>:Na<sub>2</sub>CO<sub>3</sub> =5:100; temperature (°C): 190; time (h): 12.0.

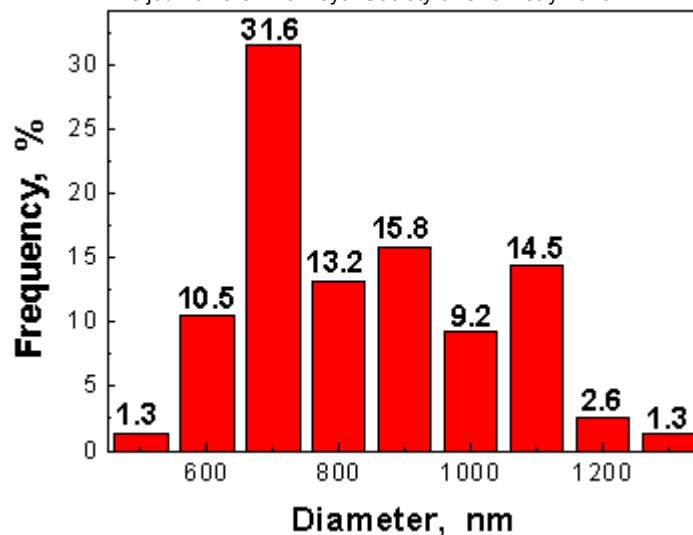

**Figure S2.** Size distribution of the mesoporous SrCO<sub>3</sub> submicron spheres. SrCl<sub>2</sub>:Na<sub>2</sub>CO<sub>3</sub>=1.1:1; EDTA disodium salt :Na<sub>2</sub>CO<sub>3</sub> =5:100; MgCl<sub>2</sub>:Na<sub>2</sub>CO<sub>3</sub> =5:100; temperature (°C): 190; time (h): 12.0.

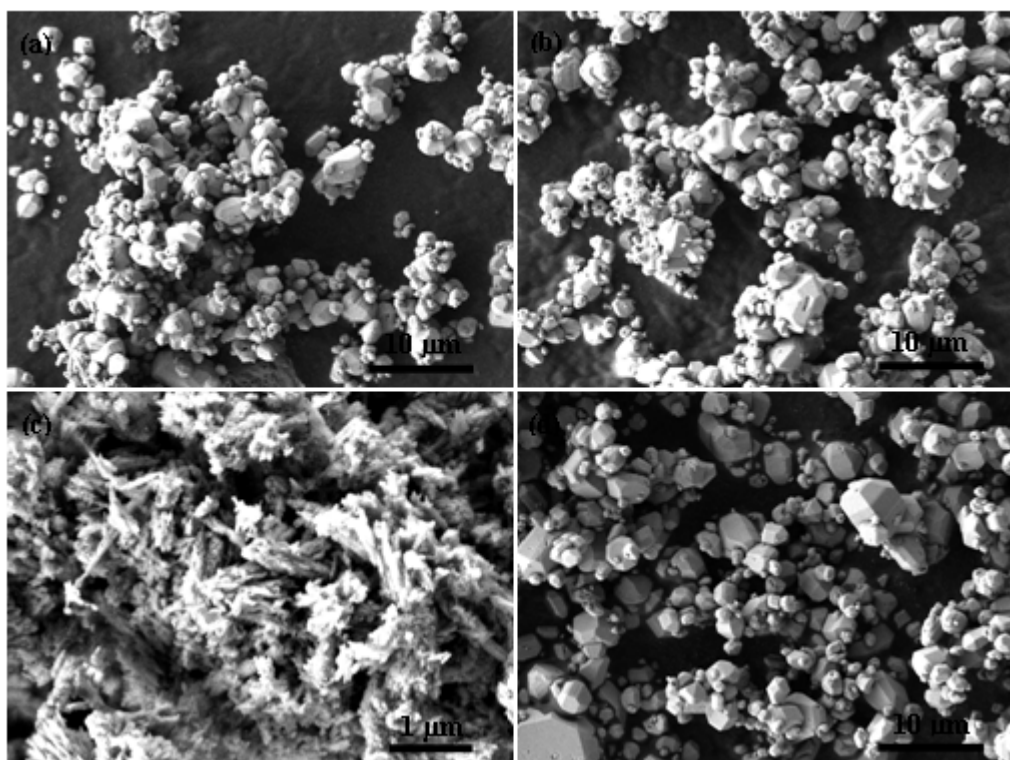

**Figure S3.** Effect of the additives on the morphology of the hydrothermally treated SrCO<sub>3</sub> particles. (a) EDTA disodium salt :Na<sub>2</sub>CO<sub>3</sub> =0:100, MgCl<sub>2</sub>:Na<sub>2</sub>CO<sub>3</sub>=0:100; (b) EDTA disodium salt :Na<sub>2</sub>CO<sub>3</sub> =5:100, MgCl<sub>2</sub>:Na<sub>2</sub>CO<sub>3</sub> =0:100; (c) MgCl<sub>2</sub>:Na<sub>2</sub>CO<sub>3</sub> =5:100, EDTA disodium salt :Na<sub>2</sub>CO<sub>3</sub> =0:100; (d) CTAB:Na<sub>2</sub>CO<sub>3</sub> =5:100, MgCl<sub>2</sub>:Na<sub>2</sub>CO<sub>3</sub> =5:100. SrCl<sub>2</sub>:Na<sub>2</sub>CO<sub>3</sub>=1.1:1; temperature (°C): 190; time (h): 12.0.
